# Supplementary material
Source: publisher site journal article supplement (https://www.dovepress.com/article/234144)
Supplement: Supplementary file 1 [file get_supplementary_file.php]

**Supplementary Figure 1**


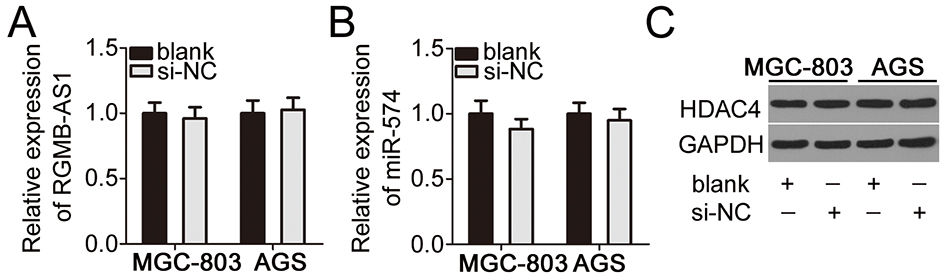


Supplementary Figure 1 Transfection with si-NC did not affect the expression of RGMB-AS1/miR-574/HDAC4 in MGC-803 and AGS cells. MGC-803 and AGS cells were transfected with or without si-NC. After transfection, expression of RGMB-AS1, miR-574, and HDAC4 were detected by means of RT-qPCR and western blotting.
